# Supplementary material for: Correction technique for Raman water vapor lidar signal-dependent bias and suitability for water vapor trend monitoring in the upper troposphere
Source: Copernicus journal article supplement (doi:10.5194/amt-5-2893-2012), 2012-11-28
Supplement: Supplementary file 1 [file amt-5-2893-2012-supplement.zip]

# Radiosonde Calibration Example. The files needed are

RadioData.dat - radiosonde mixing ratio data

RH.dat - radiosonde RH data

TempK.dat - radiosonde Temperatures in K

RadioHeights.dat - radiosonde heights

CompositeData.dat - uncalibrated lidar mixing ratio

SumErrorProfTest.dat - lidar random errors

LidarHeights.dat - lidar heights.

*Submitted as supplemental data for "Correction technique for raman water vapor lidar aignal dependent bias and suitability for water vapor trend monitoring in the upper troposphere".*

```
In[1]:= Needs["PlotLegends`"];
```

---

**Mathematica routines needed for the example to function.**

**GetRadioCalFactorRegress** is the last routine defined in this section.

```
In[2]:= GetLastPositionLess[InputList_, Value_] := Module[{i},
  i = 1;
  While[
    InputList[[i]] < Value, If[i == Length[InputList], i++; Break[]]; i++;
  i - 1]
```

```
In[3]:= GetFirstPositionGreater[InputList_, Value_] := Module[{i},
  i = 1;
  While[
    InputList[[i]] ≤ Value, If[i == Length[InputList], Break[]]; i++;
  i]
```

```
In[4]:= RunningSum[InputList_, PointsToSum_] := Module[{Nmax, i, j, OutList = {}},
  Nmax = IntegerPart[Length[InputList] / PointsToSum];
  i = 1; j = PointsToSum;
  Do[
    OutList = {OutList, Plus @@ Take[InputList, {i, j}]};
    i += PointsToSum; j += PointsToSum;
    {Nmax}};
  If[Length[InputList][[1]] > 1,
    Partition[Flatten[OutList], Length[InputList][[1]]], Flatten[OutList]]]
```

```
In[5]:= MyMedian[list1_] := Block[{s, n}, s = Sort[list1];
  n = Length[list1];  $\frac{1}{2} \left( s \left\lfloor \frac{n}{2} \right\rfloor + s \left\lfloor \frac{n}{2} + 1 \right\rfloor \right)$  /; EvenQ[Length[list1]]
```

Least Median of Squares. From Shaw - Tigg.

```

In[6]:= lmsfita[data_, x_] := Module[{l, v, i, j, w, h, a, sl, dx}, l = Length[data];
  v = Flatten[Table[{data[[i]], data[[j]]}, {i, 1, l - 1}, {j, i + 1, l}], 1];
  w = Union[Module[{dx}, dx = #1[[1, 1]] - #1[[2, 1]]; If[dx ≠ 0,
    {

$$\frac{\#1[[1, 2]] - \#1[[2, 2]]}{dx}, \frac{\#1[[1, 1]] \#1[[2, 2]] - \#1[[1, 2]] \#1[[2, 1]]}{dx}$$

    }, {∞, #1[[1, 1]]}]] &] /@ v];
  h = Function[a, {MyMedian[(If[a[[1]] ≠ ∞, (#1[[2]] - a[[1]] #1[[1]] - a[[2]])^2, (a[[2]] - #1[[1]])^2] &)] /@
    data], a[[1]], a[[2]]}];
  sl = Sort[h /@ w][[1]]; If[sl[[2]] ≠ ∞, sl[[2]] x + sl[[3]], Print["x = ", sl[[3]]]]

```

Adaptive Radiosonde Calibration Routine. The algorithm works as follows:

- 1) interpolate data to height grid approximating the sonde vertical resolution
- 2) Select initial population of points based on RSquare of linear least squares regressions of subsets of data
- 3) Delete duplicate points
- 4) presume interpolated data to approximate lidar vertical resolution
- 5) Perform Least Median of Squares regression
- 6) Remove outliers based on percentage deviation from PredictedResponse
- 7) If sufficient number of points, Use these points to calculate the final calibration value by taking the Mean ratio of the points. Also perform linear regression on final points.
- 8) If not sufficient points, decrease Rsquare and AcceptancePercentage values and repeat

```

In[7]:= GetRadioCalFactorRegress[RadioMRData_, RadioRHData_,
  RadioTData_, RadioHeights_, LidarData_, LidarDataErrs_, LidarHeights_,
  MinCalAlt_, MaxCalAlt_, MinRSquareIni_, RegressionIntervalKM_,
  AcceptancePercentageIni_, MinNumberRegressionPoints_, MinRH_, MinTempC_] :=
Module[{MinRadioBin, MaxRadioBin, MinLidarBin, MaxLidarBin, SubsetRadioHeights,
  SubsetRadioMRData, SubsetRadioRHData, SubsetRadioTData, SubsetLidarHeights,
  SubsetLidarData, MeanDeltaH, HeightsForInterp, HeightsForInterpNew, HeightsForInterpNew2,
  DataR, DataL, RadioMRFunc, RadioRHFunc, RadioTFunc, LidarFunc, InterpRadioMRData,
  InterpRadioRHData, InterpRadioTData, InterpLidarData, LidarResolution,
  MeanSondeResolution, PresumNumber, SondeMRDataNew, SondeRHDataNew, SondeTDataNew,
  SondeDataNew2, LidarDataNew, LidarDataNew2, SelectedData, RegressionData,
  ThisRegressionData, FinalResolution, NumToRegress, NumberOfRegressions, ThisRegression,
  ThisRSquare, PointsToSave, SinglePointsToSave, PointsToRegress, linfit, lmslinfit,
  PredictedLMSResponse, LMSResiduals, LMSRatios, GoodPoints1, FinalRegressionPoints,
  InitialLinFit, FinalLinFit, InitialDataPoints, FinalDataPoints, InitialCalVal,
  FinalCalVal, ThisMinRSquare, ThisAcceptancePercentage, GoodPoints, lm, x, i},

  MinRadioBin = GetFirstPositionGreater[RadioHeights, MinCalAlt];
  MaxRadioBin = GetLastPositionLess[RadioHeights, MaxCalAlt];

  MinLidarBin = GetFirstPositionGreater[LidarHeights, MinCalAlt];
  MaxLidarBin = GetLastPositionLess[LidarHeights, MaxCalAlt];

  SubsetRadioHeights = Take[RadioHeights, {MinRadioBin - 1, MaxRadioBin + 1}];
  SubsetRadioMRData = Take[RadioMRData, {MinRadioBin - 1, MaxRadioBin + 1}];

```

```

SubsetRadioRHData = Take[RadioRHData, {MinRadioBin - 1, MaxRadioBin + 1}];
SubsetRadioTData = Take[RadioTData, {MinRadioBin - 1, MaxRadioBin + 1}];

SubsetLidarHeights = Take[LidarHeights, {MinLidarBin - 1, MaxLidarBin + 1}];
SubsetLidarData = Take[LidarData, {MinLidarBin - 1, MaxLidarBin + 1}];

RadioMRFunc =
Interpolation[Thread[{SubsetRadioHeights, SubsetRadioMRData}], InterpolationOrder -> 1];
RadioRHFunc = Interpolation[Thread[{SubsetRadioHeights, SubsetRadioRHData}],
InterpolationOrder -> 1];
RadioTFunc = Interpolation[Thread[{SubsetRadioHeights, SubsetRadioTData}],
InterpolationOrder -> 1];

DataL = Transpose[{SubsetLidarHeights, SubsetLidarData}];
LidarFunc = Interpolation[DataL, InterpolationOrder -> 1];

(* determine which dataset has higher vertical resolution. Develop height grid using
mean resolution of that dataset and put all data on the same height grid *)

LidarResolution = (LidarHeights[[2]] - LidarHeights[[1]]);
MeanSondeResolution =
(SubsrtRadioHeights[[-1]] - SubsetRadioHeights[[1]]) / Length[SubsetRadioHeights];
MeanDeltaH = Min[LidarResolution, MeanSondeResolution];
HeightsForInterp = Table[SubsetRadioHeights[[2]] + (i - 1) MeanDeltaH,
{i, 1, IntegerPart[(MaxCalAlt - MinCalAlt) / MeanDeltaH] - 1}];

InterpRadioMRData = RadioMRFunc[HeightsForInterp];
InterpRadioRHData = RadioRHFunc[HeightsForInterp];
InterpRadioTData = RadioTFunc[HeightsForInterp];
InterpLidarData = LidarFunc[HeightsForInterp];

(* presume data to approximate the resolution of the lidar data *)

PresumNumber = Max[IntegerPart[LidarResolution / MeanDeltaH], 1];
HeightsForInterpNew = RunningSum[HeightsForInterp, PresumNumber] / PresumNumber;
SondeMRDataNew = RunningSum[InterpRadioMRData, PresumNumber] / PresumNumber;
SondeRHDataNew = RunningSum[InterpRadioRHData, PresumNumber] / PresumNumber;
SondeTDataNew = RunningSum[InterpRadioTData, PresumNumber] / PresumNumber;
LidarDataNew = RunningSum[InterpLidarData, PresumNumber] / PresumNumber;

(* select the data according to RH and T thresholds if desired *)

SelectedData = Select[Thread[{SondeMRDataNew, SondeRHDataNew, SondeTDataNew,
LidarDataNew, HeightsForInterpNew}], #[[2]] > MinRH && #[[3]] > MinTempC &];
LidarDataNew2 = Transpose[SelectedData][[4]];
SondeDataNew2 = Transpose[SelectedData][[1]];
HeightsForInterpNew2 = Transpose[SelectedData][[5]];

(* initial linear fit and mean cal constant *)

InitialLinFit =

```

```

LinearModelFit[Thread[{LidarDataNew2, SondeDataNew2}], x, x][["BestFitParameters"]];
InitialCalVal = Mean[SondeDataNew2 / LidarDataNew2];
InitialDataPoints = {LidarDataNew2, SondeDataNew2, HeightsForInterpNew2};

(* Determine how many points in each regression and how many total regressions *)

FinalResolution = HeightsForInterpNew[[2]] - HeightsForInterpNew[[1]];
NumToRegress = IntegerPart[RegressionIntervalKM / FinalResolution];
(* number of points to use in each regression *)
NumberOfRegressions = Length[LidarDataNew2] - NumToRegress + 1;
(* total number of regressions in the While loop *)
(* Print[NumToRegress, " ", NumberOfRegressions]; *)

(* select points within user defined region based on R-
square. Retain a point if it is in any regression interval that
qualifies. Maintain height at which points occur. Eliminate duplicate points. *)

RegressionData = Thread[{LidarDataNew2, SondeDataNew2, HeightsForInterpNew2}];
PointsToSave = {};

(* the outer while loop is to adjust the values of MinRSquare and
AcceptancePercentage if insufficient number of good points are found *)

ThisMinRSquare = MinRSquareIni;
ThisAcceptancePercentage = AcceptancePercentageIni;
GoodPoints = {};
While[Length[GoodPoints] ≤ MinNumberRegressionPoints,

(* the inner while loop selects by Rsquare and filters data using LMS regression *)

i = 1;
While[i ≤ NumberOfRegressions,
ThisRegressionData = Take[RegressionData, {i, i + NumToRegress - 1}];
PointsToRegress = Transpose[Drop[Transpose[ThisRegressionData], -1]];
(* the Transpose[Drop[Transpose operation selects just the ordered pairs *)
lm = LinearModelFit[PointsToRegress, x, x];
ThisRSquare = lm["RSquared"];
If[ThisRSquare ≥ ThisMinRSquare, PointsToSave = Append[PointsToSave, ThisRegressionData]];
(* the heights data are included here *)
i++;
];
SinglePointsToSave = DeleteDuplicates[Flatten[PointsToSave, 1]];
(* the heights data are included here *)

(* Use Least median of squares on this population of points. Use
AcceptancePercentage to eliminate outliers from the LMS fit *)
If[Length[SinglePointsToSave] ≥ MinNumberRegressionPoints,

PointsToRegress = Transpose[Drop[Transpose[SinglePointsToSave], -1]];
{linfit, lmslinfit} = {Fit[PointsToRegress, {1, x}, x], lmsfita[PointsToRegress, x]};

PredictedLMSResponse = lmslinfit /. x → Transpose[PointsToRegress][[1]];

```

```

LMSRatios = Transpose[PointsToRegress][[2]] / PredictedLMSResponse;

GoodPoints = Select[Thread[{LMSRatios, SinglePointsToSave}],
  (#[[1]] > 1 - ThisAcceptancePercentage && #[[1]] < 1 + ThisAcceptancePercentage) &];
];

ThisMinRSquare = ThisMinRSquare - 0.0125;
ThisAcceptancePercentage = ThisAcceptancePercentage + 0.005;

];

FinalRegressionPoints = Transpose[GoodPoints][[2]];
PointsToRegress = Transpose[Drop[Transpose[FinalRegressionPoints], -1]];
FinalLinFit = LinearModelFit[PointsToRegress, x, x][["BestFitParameters"]];
FinalCalVal = Mean[Transpose[PointsToRegress][[2]] / Transpose[PointsToRegress][[1]]];
FinalDataPoints = Transpose[FinalRegressionPoints];

{InitialCalVal, InitialDataPoints, InitialLinFit, FinalCalVal, FinalDataPoints,
FinalLinFit, lmslinfit, ThisMinRSquare + 0.0125, ThisAcceptancePercentage - 0.005}
]

```

Set the directory to where the input data files are located and read the data.

```

In[8]:= SetDirectory["C:\\Data\\Processed\\UWO_2012\\ALVICE\\CalExample\\"];

In[9]:= RadioData = << "RadioData.dat";
RH = << "RH.dat";
TempK = << "TempK.dat";
RadioHeights = << "RadioHeights.dat";
CompositeData = << "CompositeData.dat";
CompositeError = << "SumErrorProfTest.dat";
LidarHeights = << "LidarHeights.dat";

```

Execute the adaptive routine for the case of a single radiosonde - lidar comparison.

```

In[16]:= {InitialCalVal, InitialDataPoints, InitialLinFit, FinalCalVal, FinalDataPoints,
  FinalLinFit, lmslinfit, MinRSquareFinal, AcceptancePercentageFinal} =
  GetRadioCalFactorRegress[RadioData, RH, TempK - 273.15, RadioHeights,
  LidarData = CompositeData, LidarDataErrs = CompositeError, LidarHeights,
  MinCalAlt = 2.275, MaxCalAlt = 5.275, MinRSquare = 0.95, RegressionIntervalKM = 0.5,
  AcceptancePercentage = 0.03, MinRegressPts = 30, MinRH = 5, MinTempC = -50];

```

Package the data and plot.

```

SondeProfilePoints = Thread[{InitialDataPoints[[2]], InitialDataPoints[[3]]}];
LidarProfilePoints = Thread[{FinalCalVal InitialDataPoints[[1]], InitialDataPoints[[3]]}];

plr = ListPlot[{SondeProfilePoints, LidarProfilePoints}, Joined → False,
  Axes → False, Frame → True, FrameLabel → {"Mixing Ratio (g/kg)", "Altitude (km)"},
  PlotRange → {{0.9 Min[FinalCalVal FinalDataPoints[[1]]],
    1.2 Max[FinalCalVal FinalDataPoints[[1]]]}, {MinCalAlt, MaxCalAlt}},
  PlotStyle → {Directive[PointSize[Medium], Black], Directive[PointSize[Medium], Red]},
  PlotMarkers → Automatic, PlotLegend → {"Sonde", "Lidar"}, LegendPosition → {0.3, 0.3},
  LegendTextSpace → 10, LegendSpacing → 1, LegendSize → {0.3, 0.2},
  LegendShadow → False, BaseStyle → {FontSize → 14, FontFamily → "Helvetica"}];

plra = Show[plr, Epilog →
  Inset[Framed[Style["Before selection", 12], Background → LightYellow], {-0.3, 0.45}]];
SondeFinalProfilePoints = Thread[{FinalDataPoints[[2]], FinalDataPoints[[3]]}];
LidarFinalProfilePoints = Thread[{FinalCalVal FinalDataPoints[[1]], FinalDataPoints[[3]]}];

In[23]:= p2r = ListPlot[{SondeFinalProfilePoints, LidarFinalProfilePoints}, Joined → False,
  Axes → False, Frame → True, FrameLabel → {"Mixing Ratio (g/kg)", "Altitude (km)"},
  PlotRange → {{0.9 Min[FinalCalVal FinalDataPoints[[1]]],
    1.2 Max[FinalCalVal FinalDataPoints[[1]]]}, {MinCalAlt, MaxCalAlt}},
  PlotStyle → {Directive[PointSize[Medium], Black], Directive[PointSize[Medium], Red]},
  PlotMarkers → Automatic, PlotLegend → {"Sonde", "Lidar"}, LegendPosition → {0.3, 0.3},
  LegendTextSpace → 10, LegendSpacing → 1, LegendSize → {0.3, 0.2},
  LegendShadow → False, BaseStyle → {FontSize → 14, FontFamily → "Helvetica"}];

In[24]:= p2ra = Show[p2r, Epilog →
  Inset[Framed[Style["After selection", 12], Background → LightYellow], {-0.3, 0.45}]];
InitialRegressionPairs = Thread[{InitialDataPoints[[1]], InitialDataPoints[[2]]}];
FinalRegressionPairs = Thread[{FinalDataPoints[[1]], FinalDataPoints[[2]]}];

In[27]:= p4r = Plot[{InitialLinFit[[1]] + InitialLinFit[[2]] x, FinalLinFit[[1]] + FinalLinFit[[2]] x},
  {x, 0, 1.1 Max[InitialDataPoints[[1]]]},
  PlotRange → {{0, 1.1 Max[InitialDataPoints[[1]]]}, {0, 1.1 Max[InitialDataPoints[[2]]]}},
  Axes → False, Frame → True, FrameLabel → {"Lidar (uncal)", "Sonde (g/kg)"},
  PlotLegend → {"Initial Regress", "Final Regress"}, LegendPosition → {0.4, -0.2},
  LegendTextSpace → 10, LegendSpacing → 0.2, LegendSize → {0.4, 0.15},
  LegendShadow → False, BaseStyle → {FontSize → 14, FontFamily → "Helvetica"},
  Evaluate[Epilog → {Black, PointSize[0.02], Point /@ InitialRegressionPairs,
    Red, PointSize[0.02], Point /@ FinalRegressionPairs,
    Inset[Framed[Style["Calini = " <> ToString[InitialCalVal] <> "\nCalfin= " <> ToString[
      FinalCalVal] <> "\nMinRsqr = " <> ToString[MinRSquareFinal] <> "\nAcc%= " <>
      ToString[AcceptancePercentageFinal], 12], Background → LightYellow],
      {0.2 Max[InitialDataPoints[[1]]], 0.9 Max[InitialDataPoints[[2]]]}]}]];

```

Export the graphic to see the results.

```

In[28]:= Export["RadioCalAnalysisTest.gif", GraphicsGrid[{ {plra, p2ra}, {p4r} },
  Spacings → {-50, 10}], ImageSize → 1000, ImageResolution → 100];

```
